# Supplementary material for: Structure-Based Discovery of ABCG2 Inhibitors: A Homology Protein-Based Pharmacophore Modeling and Molecular Docking Approach
Source: MDPI journal article supplement (doi:10.3390/molecules26113115), 2021-05-23
Supplement: s1 [file s1]

## SUPPORTING INFORMATION

### Structure-based discovery of ABCG2 inhibitors: a homology protein-based pharmacophore modeling and molecular docking approach

Minh-Tri Le <sup>1,2</sup>, Viet-Nham Hoang <sup>1,3</sup>, Dac-Nhan Nguyen <sup>1</sup>, Thi-Hoang-Linh Bui <sup>1</sup>, Thien-Vy Phan <sup>1,4</sup>,  
Phuong Nguyen-Hoai Huynh <sup>1</sup>, Thanh-Dao Tran <sup>1</sup> and Khac-Minh Thai <sup>1,\*</sup>

<sup>1</sup> Faculty of Pharmacy, University of Medicine and Pharmacy at Ho Chi Minh City, Ho Chi Minh City 100000, Vietnam; [leminhtri@ump.edu.vn](mailto:leminhtri@ump.edu.vn) (M.-T.L.); [hoangvietnham@gmail.com](mailto:hoangvietnham@gmail.com) (V.-N.H.); [michael.dacnhan@gmail.com](mailto:michael.dacnhan@gmail.com) (D.-N.N.); [bthlinh.duoc16@ump.edu.vn](mailto:bthlinh.duoc16@ump.edu.vn) (H.-T.-L.B.); [ptvy@ntt.edu.vn](mailto:ptvy@ntt.edu.vn) (T.-V.P.); [huynhnguyenhoaiphuong@gmail.com](mailto:huynhnguyenhoaiphuong@gmail.com) (P.N.-H.H.); [daott@ump.edu.vn](mailto:daott@ump.edu.vn) (T.-D.T.)

<sup>2</sup> School of Medicine, Vietnam National University Ho Chi Minh City, Ho Chi Minh City 100000, Vietnam

<sup>3</sup> Department of Pharmacy, Lac Hong University, DongNai Province 810000, Vietnam

<sup>4</sup> Department of Pharmacy, Nguyen Tat Thanh University, Ho Chi Minh City 100000, Vietnam

\* Correspondence: [thaikhacminh@ump.edu.vn](mailto:thaikhacminh@ump.edu.vn) or [thaikhacminh@gmail.com](mailto:thaikhacminh@gmail.com); Tel.: +84-909-680-385; Fax: +84-28-3822-5435

**Table S1.** ABCG2 strong inhibitors in the training set

**Table S2.** Docking scores of ABCG2 inhibitors in test set of the pharmacophore model

**Figure S1.** The amino acid sequence of the ABCG2 protein

**Table S1.** ABCG2 strong inhibitors in the training set

| No | Substance name/ structure group                               | Structure                                                                            | IC <sub>50</sub><br>(nM) |
|----|---------------------------------------------------------------|--------------------------------------------------------------------------------------|--------------------------|
| 1  | JMC_2009_52_1190_Ko143<br>Derivative of fumitremorgin C       | 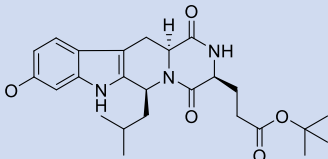   | 225                      |
| 2  | JMC_2009_52_1191_Elacridar<br>Acridone derivative             |    | 250                      |
| 3  | DMD_2017_45_1166_Curcumin<br>Curcumin group                   |    | 650                      |
| 4  | BMC_2012_20_346_25<br>Chalcone derivative                     |  | 530                      |
| 5  | CMC_2012_7_650_PD158780<br>pyrido[3,4,d]pyrimidine derivative |  | 360                      |
| 6  | JMC_2009_52_1190_6<br>Tariquidar derivative                   |  | 60                       |
| 7  | DDDT_2015_9_3481_5j<br>Indeno[1,2-b]indol derivative          |  | 200                      |

| No | Substance name/ structure group                                      | Structure                                                                            | IC <sub>50</sub><br>(nM) |
|----|----------------------------------------------------------------------|--------------------------------------------------------------------------------------|--------------------------|
| 8  | JMC_2016_117_212_35<br>Chalcone derivative combines with quinazoline | 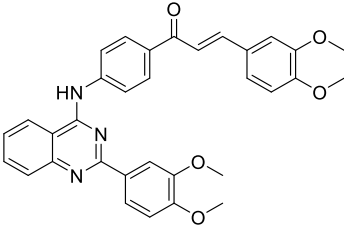   | 190                      |
| 9  | BMC_2013_21_7858_31<br>Quinazoline derivative                        |    | 76                       |
| 10 | JMC_2018_146_483_43<br>Tariquidar derivative                         |   | 61.6                     |
| 11 | JMC_2016_59_6121_51<br>tetrahydro-β-carboline derivative             |  | 233                      |
| 12 | ACSMCL_2013_4_393_22a<br>biphenyl benzanilide derivative             |  | 591                      |

| No | Substance name/ structure group                    | Structure                                                                           | IC <sub>50</sub><br>(nM) |
|----|----------------------------------------------------|-------------------------------------------------------------------------------------|--------------------------|
| 13 | DMD_2017_45_1166_GOY168<br>Curcumin derivative     | 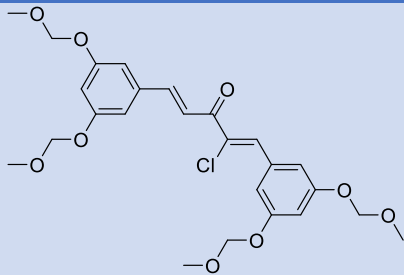  | 250                      |
| 14 | JMC_2018_61_3382_15<br>Pyridopyrimidine derivative |  | 149                      |
| 15 | JMC_2017_60_4474_47<br>Pyrimidine derivative       |   | 98.8                     |

**Table S2.** Docking scores of ABCG2 inhibitors in test set of the pharmacophore model

| No. | Name                     | Pharmacophore model | Docking score | pIC <sub>50</sub> |
|-----|--------------------------|---------------------|---------------|-------------------|
| 1   | CMC_2015_10_742_14       | 1                   | -28.34        | 5.79              |
| 2   | BMC_2013_21_7858_53      | 1                   | -28.25        | 6.48              |
| 3   | CMC_2013_8_125_9         | 0                   | -27.56        | 5.07              |
| 4   | JMC_2018_146_483_27      | 1                   | -27.20        | 6.57              |
| 5   | JMC_2018_146_483_37      | 1                   | -27.03        | 6.72              |
| 6   | JMC_2018_146_483_33      | 1                   | -26.99        | 6.13              |
| 7   | JMC_2018_146_483_36      | 1                   | -26.87        | 6.59              |
| 8   | JMC_2018_146_483_30      | 1                   | -26.86        | 6.75              |
| 9   | CMC_2012_7_650_nilotinib | 0                   | -26.41        | 6.17              |
| 10  | JMC_2018_61_7952_49      | 1                   | -26.28        | 5.94              |
| 11  | JMC_2018_61_7952_24      | 1                   | -25.91        | 7.1               |
| 12  | CMC_2013_8_125_26        | 0                   | -25.90        | 4.67              |
| 13  | CMC_2013_8_125_8         | 0                   | -25.76        | 5.41              |
| 14  | JMC_2018_61_7952_36      | 1                   | -25.66        | 7.18              |
| 15  | CMC_2013_8_125_7         | 0                   | -25.62        | 5.16              |
| 16  | JMC_2018_61_3389_22      | 1                   | -25.35        | 5.28              |
| 17  | JMC_2018_146_483_31      | 1                   | -25.28        | 6.54              |

| No. | Name                | Pharmacophore model | Docking score | pIC <sub>50</sub> |
|-----|---------------------|---------------------|---------------|-------------------|
| 18  | JMC_2018_61_7952_39 | 1                   | -25.20        | 7.35              |
| 19  | JMC_2018_61_7952_16 | 1                   | -25.13        | 6.92              |
| 20  | JMC_2018_61_7952_57 | 1                   | -25.05        | 6.56              |
| 21  | JMC_2018_61_3389_34 | 1                   | -24.96        | 5.19              |
| 22  | BMC_2013_21_7858_22 | 1                   | -24.94        | 5.61              |
| 23  | CMC_2015_10_742_32  | 0                   | -24.89        | 5.21              |
| 24  | JMC_2015_58_3910_7  | 1                   | -24.63        | 7                 |
| 25  | CMC_2013_8_125_10   | 0                   | -24.53        | 5.57              |
| 26  | JMC_2015_58_3910_9  | 1                   | -24.46        | 6.58              |
| 27  | BMC_2017_22_6766_12 | 1                   | -24.44        | 6.92              |
| 28  | JMC_2018_61_3389_26 | 1                   | -24.33        | 6.13              |
| 29  | JMC_2018_61_3389_45 | 1                   | -24.12        | 4.77              |
| 30  | CMC_2013_8_125_18   | 0                   | -24.00        | 5.09              |
| 31  | JMC_2018_61_3389_11 | 1                   | -23.91        | 6.28              |
| 32  | JMC_2018_61_7952_15 | 1                   | -23.91        | 7.19              |
| 33  | CMC_2015_10_742_7   | 0                   | -23.88        | 5.45              |
| 34  | JMC_2018_61_7952_25 | 1                   | -23.86        | 6.04              |
| 35  | CMC_2015_10_742_27  | 0                   | -23.81        | 6.25              |
| 36  | JMC_2018_61_7952_51 | 1                   | -23.68        | 5.98              |
| 37  | BMC_2013_21_7858_11 | 1                   | -23.66        | 6.24              |
| 38  | JMC_2018_146_483_28 | 1                   | -23.61        | 6.37              |
| 39  | CMC_2013_8_125_16   | 0                   | -23.57        | 5.88              |
| 40  | BMC_2013_21_7858_26 | 1                   | -23.56        | 6.82              |
| 41  | JMC_2018_61_7952_41 | 1                   | -23.55        | 7.63              |
| 42  | JMC_2018_146_483_11 | 1                   | -23.54        | 5.63              |
| 43  | BMC_2013_21_7858_20 | 1                   | -23.51        | 6.89              |
| 44  | JMC_2018_61_3389_20 | 1                   | -23.42        | 5.91              |
| 45  | CMC_2015_10_742_8   | 0                   | -23.37        | 5.75              |
| 46  | JMC_2018_61_3389_12 | 1                   | -23.37        | 6.28              |
| 47  | JMC_2018_61_7952_56 | 1                   | -23.35        | 7.1               |
| 48  | JMC_2018_61_7952_21 | 1                   | -23.31        | 7.29              |
| 49  | JMC_2015_58_3910_25 | 1                   | -23.30        | 7.1               |
| 50  | CMC_2015_10_742_21  | 0                   | -23.20        | 5.68              |
| 51  | JMC_2018_61_3389_44 | 1                   | -23.19        | 5.91              |
| 52  | BMC_2013_21_7858_14 | 1                   | -23.12        | 5.78              |
| 53  | JMC_2015_58_3910_11 | 1                   | -23.08        | 6.93              |
| 54  | JMC_2018_61_7952_37 | 1                   | -23.07        | 7.21              |
| 55  | JMC_2018_61_3389_30 | 1                   | -23.02        | 6.02              |
| 56  | JMC_2015_58_3910_10 | 1                   | -22.99        | 7.1               |
| 57  | JMC_2018_146_483_8  | 1                   | -22.94        | 6.36              |
| 58  | CMC_2013_8_125_12   | 0                   | -22.93        | 5.59              |

| No. | Name                    | Pharmacophore model | Docking score | pIC <sub>50</sub> |
|-----|-------------------------|---------------------|---------------|-------------------|
| 59  | JMC_2018_61_7952_46     | 1                   | -22.89        | 6.1               |
| 60  | CMC_2015_10_742_33      | 0                   | -22.87        | 5.47              |
| 61  | JMC_2018_61_3389_24     | 1                   | -22.84        | 6.79              |
| 62  | JMC_2018_61_7952_50     | 0                   | -22.83        | 5.79              |
| 63  | JMC_2018_61_7952_55     | 1                   | -22.82        | 6.45              |
| 64  | JMC_2018_61_7952_22     | 1                   | -22.80        | 7.31              |
| 65  | JMC_2018_61_3389_39     | 1                   | -22.76        | 6.21              |
| 66  | BMC_2013_21_7858_13     | 1                   | -22.75        | 5.71              |
| 67  | JMC_2018_61_3389_25     | 1                   | -22.73        | 6.34              |
| 68  | JMC_2018_61_7952_14     | 1                   | -22.69        | 6.97              |
| 69  | JMC_2018_61_3389_37     | 1                   | -22.61        | 6.79              |
| 70  | JMC_2015_58_3910_19     | 1                   | -22.54        | 6.57              |
| 71  | JMC_2018_61_3389_41     | 1                   | -22.49        | 5.82              |
| 72  | JMC_2018_61_3389_23     | 1                   | -22.49        | 6.75              |
| 73  | JMC_2015_58_3910_20     | 1                   | -22.48        | 6.7               |
| 74  | JMC_2018_61_7952_26     | 1                   | -22.48        | 7.33              |
| 75  | CMC_2013_8_125_11       | 0                   | -22.45        | 5.39              |
| 76  | JMC_2018_61_3389_40     | 1                   | -22.29        | 6.2               |
| 77  | JMC_2015_58_3910_22     | 1                   | -22.20        | 7.14              |
| 78  | BMC_2013_21_7858_24     | 1                   | -22.19        | 6.6               |
| 79  | JMC_2018_61_7952_31     | 1                   | -22.13        | 7.56              |
| 80  | JMC_2018_61_3389_46     | 1                   | -22.13        | 6.05              |
| 81  | JMC_2018_61_3389_10     | 1                   | -22.11        | 6.83              |
| 82  | JMC_2018_61_7952_30     | 1                   | -22.09        | 7.22              |
| 83  | JMC_2018_146_483_43     | 1                   | -22.06        | 7.21              |
| 84  | CMC_2013_8_125_21       | 0                   | -22.01        | 5.46              |
| 85  | JMC_2018_61_7952_35     | 1                   | -22.00        | 7.35              |
| 86  | CMC_2015_10_742_24      | 0                   | -21.98        | 5.54              |
| 87  | JMC_2015_58_3910_23     | 1                   | -21.98        | 6.74              |
| 88  | JMC_2018_61_3389_38     | 1                   | -21.98        | 6.27              |
| 89  | JMC_2018_61_7952_58     | 1                   | -21.88        | 5.2               |
| 90  | JMC_2018_146_483_40     | 1                   | -21.83        | 6.89              |
| 91  | JMC_2015_58_3910_5      | 1                   | -21.82        | 6.74              |
| 92  | CMC_2015_10_742_19      | 1                   | -21.82        | 4.64              |
| 93  | JMC_2018_61_7952_23     | 1                   | -21.81        | 7.43              |
| 94  | JMC_2018_146_483_12     | 1                   | -21.75        | 4.82              |
| 95  | CMC_2012_7_650_imatinib | 1                   | -21.73        | 5.03              |
| 96  | BMC_2013_21_7858_40     | 0                   | -21.68        | 5.95              |
| 97  | JMC_2018_61_7952_17     | 1                   | -21.67        | 7.48              |
| 98  | JMC_2018_61_3389_27     | 1                   | -21.64        | 5.9               |
| 99  | JMC_2018_61_7952_45     | 1                   | -21.59        | 6.14              |

| No. | Name                | Pharmacophore model | Docking score | pIC <sub>50</sub> |
|-----|---------------------|---------------------|---------------|-------------------|
| 100 | JMC_2015_58_3910_14 | 1                   | -21.48        | 6.86              |
| 101 | JMC_2018_61_3389_21 | 1                   | -21.34        | 5.69              |
| 102 | CMC_2015_10_742_11  | 0                   | -21.32        | 4.87              |
| 103 | JMC_2015_58_3910_24 | 1                   | -21.30        | 7.19              |
| 104 | JMC_2018_146_483_32 | 1                   | -21.30        | 6.35              |
| 105 | JMC_2015_58_3910_21 | 1                   | -21.26        | 6.93              |
| 106 | BMC_2013_21_7858_31 | 1                   | -21.25        | 7.12              |
| 107 | BMC_2013_21_7858_30 | 1                   | -21.21        | 6.19              |
| 108 | JMC_2018_61_7952_43 | 1                   | -21.20        | 6.43              |
| 109 | CMC_2015_10_742_20  | 0                   | -21.16        | 5.75              |
| 110 | CMC_2013_8_125_4    | 1                   | -21.16        | 5.8               |
| 111 | BMC_2013_21_7858_36 | 1                   | -21.12        | 6.85              |
| 112 | CMC_2015_10_742_9   | 0                   | -21.07        | 6.03              |
| 113 | BMC_2012_22_6766_11 | 1                   | -21.04        | 5.23              |
| 114 | BMC_2013_21_7858_10 | 1                   | -21.01        | 5.43              |
| 115 | BMC_2013_21_7858_28 | 1                   | -20.98        | 6.54              |
| 116 | JMC_2018_146_483_10 | 1                   | -20.98        | 6.12              |
| 117 | JMC_2018_61_3389_35 | 1                   | -20.98        | 6.58              |
| 118 | CMC_2015_10_742_18  | 1                   | -20.97        | 5.08              |
| 119 | JMC_2018_146_483_9  | 0                   | -20.97        | 6.95              |
| 120 | JMC_2018_61_7952_42 | 1                   | -20.88        | 7.24              |
| 121 | BMC_2013_21_7858_33 | 1                   | -20.88        | 6.52              |
| 122 | JMC_2018_61_3389_19 | 1                   | -20.84        | 6.69              |
| 123 | JMC_2018_61_7952_34 | 1                   | -20.84        | 7                 |
| 124 | BMC_2013_21_7858_12 | 1                   | -20.82        | 5.17              |
| 125 | JMC_2018_146_483_35 | 1                   | -20.80        | 6.57              |
| 126 | BMC_2013_21_7858_50 | 1                   | -20.78        | 6.17              |
| 127 | JMC_2018_146_483_24 | 1                   | -20.61        | 5.97              |
| 128 | JMC_2018_61_7952_32 | 1                   | -20.60        | 7.23              |
| 129 | CMC_2015_10_742_5   | 0                   | -20.54        | 5.91              |
| 130 | JMC_2015_58_3910_17 | 1                   | -20.51        | 4.95              |
| 131 | JMC_2018_61_3389_13 | 1                   | -20.48        | 4.71              |
| 132 | JMC_2018_61_7952_44 | 1                   | -20.44        | 6.19              |
| 133 | JMC_2018_61_7952_38 | 1                   | -20.41        | 7.48              |
| 134 | BMC_2013_21_7858_27 | 1                   | -20.41        | 5.7               |
| 135 | JMC_2018_146_483_23 | 1                   | -20.36        | 6.54              |
| 136 | CMC_2015_10_742_17  | 1                   | -20.34        | 5.94              |
| 137 | CMC_2013_8_125_28   | 0                   | -20.29        | 5.34              |
| 138 | JMC_2018_61_3389_16 | 1                   | -20.28        | 6.82              |
| 139 | JMC_2018_61_3389_50 | 1                   | -20.24        | 5.88              |
| 140 | JMC_2018_61_3389_53 | 1                   | -20.18        | 6.69              |

| No. | Name                    | Pharmacophore model | Docking score | pIC <sub>50</sub> |
|-----|-------------------------|---------------------|---------------|-------------------|
| 141 | JMC_2018_146_483_26     | 1                   | -20.14        | 6.29              |
| 142 | BMC_2013_21_7858_35     | 1                   | -20.14        | 6.59              |
| 143 | JMC_2015_58_3910_16     | 1                   | -20.13        | 6.35              |
| 144 | BMC_2013_21_7858_21     | 1                   | -20.00        | 6.01              |
| 145 | BMC_2013_21_7858_32     | 1                   | -19.98        | 6.52              |
| 146 | JMC_2018_61_3389_31     | 1                   | -19.86        | 5.89              |
| 147 | JMC_2018_61_7952_18     | 1                   | -19.82        | 7.43              |
| 148 | CMC_2013_8_125_25       | 0                   | -19.79        | 5.94              |
| 149 | JMC_2016_59_6121_45     | 0                   | -19.68        | 5.88              |
| 150 | CMC_2013_8_125_13       | 0                   | -19.64        | 5.51              |
| 151 | JMC_2018_61_7952_48     | 1                   | -19.63        | 5.27              |
| 152 | JMC_2018_146_483_34     | 1                   | -19.63        | 6.45              |
| 153 | JMC_2018_146_483_44     | 1                   | -19.59        | 6.99              |
| 154 | CMC_2015_10_742_16      | 1                   | -19.43        | 5.48              |
| 155 | JMC_2018_146_483_7      | 0                   | -19.40        | 7.05              |
| 156 | CMC_2013_8_125_27       | 0                   | -19.30        | 5.44              |
| 157 | JMC_2018_61_7952_28     | 1                   | -19.27        | 7.12              |
| 158 | JMC_2016_59_6121_29     | 0                   | -19.12        | 5.11              |
| 159 | JMC_2018_61_7952_47     | 1                   | -19.11        | 6.08              |
| 160 | JMC_2018_146_483_25     | 1                   | -19.08        | 6.09              |
| 161 | JMC_2015_58_3910_18     | 1                   | -19.06        | 6.97              |
| 162 | JMC_2016_59_6121_40     | 0                   | -19.02        | 5.9               |
| 163 | BMC_2013_21_7858_47     | 1                   | -19.02        | 6.09              |
| 164 | JMC_2018_146_483_22     | 1                   | -18.95        | 6.25              |
| 165 | BMC_2012_20_346_32      | 0                   | -18.86        | 5.01              |
| 166 | BMC_2013_21_7858_37     | 1                   | -18.83        | 6.33              |
| 167 | JMC_2016_59_6121_33     | 0                   | -18.76        | 5.96              |
| 168 | BMC_2012_22_6766_23     | 1                   | -18.55        | 5.1               |
| 169 | JMC_2018_61_3389_18     | 1                   | -18.54        | 6.46              |
| 170 | CMC_2013_8_125_17       | 0                   | -18.48        | 5.06              |
| 171 | JMC_2018_61_3389_52     | 1                   | -18.45        | 6.82              |
| 172 | JMC_2018_146_483_13     | 1                   | -18.42        | 4.73              |
| 173 | BMC_2013_21_7858_15     | 1                   | -18.42        | 5.65              |
| 174 | CMC_2012_7_650_PD158780 | 0                   | -18.39        | 6.44              |
| 175 | BMC_2012_20_346_20      | 1                   | -18.28        | 5.99              |
| 176 | BMC_2013_21_7858_17     | 1                   | -18.27        | 5.71              |
| 177 | BMC_2013_21_7858_51     | 1                   | -18.25        | 6.1               |
| 178 | JMC_2018_146_483_21     | 1                   | -18.19        | 5.16              |
| 179 | BMC_2012_20_346_9       | 0                   | -18.16        | 5.71              |
| 180 | BMC_2013_21_7858_25     | 1                   | -18.14        | 5.82              |
| 181 | JMC_2018_61_3389_36     | 1                   | -18.13        | 6.37              |



| No. | Name                  | Pharmacophore model | Docking score | pIC <sub>50</sub> |
|-----|-----------------------|---------------------|---------------|-------------------|
| 182 | JMC_2018_146_483_42   | 1                   | -18.10        | 6.89              |
| 183 | BMC_2012_20_346_37    | 0                   | -18.08        | 4.65              |
| 184 | CMC_2015_10_742_6     | 0                   | -18.06        | 5.88              |
| 185 | CMC_2015_10_742_29    | 0                   | -18.04        | 5.74              |
| 186 | JMC_2018_61_7952_33   | 1                   | -18.02        | 7.52              |
| 187 | BMC_2012_20_346_34    | 0                   | -18.01        | 5.25              |
| 188 | BMC_2013_21_7858_38   | 0                   | -17.98        | 5.97              |
| 189 | JMC_2016_59_6121_41   | 0                   | -17.93        | 5.75              |
| 190 | JMC_2018_146_483_20   | 1                   | -17.91        | 5.49              |
| 191 | BMC_2013_21_7858_48   | 0                   | -17.84        | 5.53              |
| 192 | BMC_2012_20_346_40    | 1                   | -17.81        | 6.14              |
| 193 | BMC_2013_21_7858_41   | 0                   | -17.79        | 6.03              |
| 194 | JMC_2018_61_3389_17   | 1                   | -17.74        | 6.62              |
| 195 | BMC_2013_21_7858_29   | 1                   | -17.74        | 6.38              |
| 196 | CMC_2013_8_125_23     | 0                   | -17.72        | 4.89              |
| 197 | JMC_2018_61_3389_32   | 1                   | -17.71        | 6.24              |
| 198 | JMC_2016_59_6121_35   | 0                   | -17.70        | 6.16              |
| 199 | JMC_2018_61_3389_33   | 1                   | -17.65        | 6.04              |
| 200 | BMC_2012_20_346_22    | 0                   | -17.42        | 5.95              |
| 201 | JMC_2016_59_6121_49   | 1                   | -17.39        | 6.09              |
| 202 | JMC_2016_59_6121_23   | 1                   | -17.39        | 5.72              |
| 203 | BMC_2012_22_6766_22   | 1                   | -17.23        | 5.05              |
| 204 | JMC_2018_146_483_29   | 1                   | -17.23        | 6.64              |
| 205 | JMC_2016_59_6121_47   | 1                   | -17.23        | 5.84              |
| 206 | JMC_2018_146_483_41   | 1                   | -17.23        | 7.11              |
| 207 | JMC_2016_59_6121_31   | 0                   | -17.21        | 5.35              |
| 208 | JMC_2016_59_6121_26   | 0                   | -17.14        | 5.84              |
| 209 | BMC_2012_22_6766_24   | 1                   | -17.10        | 5.03              |
| 210 | CMC_2015_10_742_28    | 0                   | -16.94        | 5.29              |
| 211 | JMC_2016_59_6121_52   | 1                   | -16.87        | 6.62              |
| 212 | JMC_2016_59_6121_39   | 0                   | -16.77        | 6.48              |
| 213 | BMC_2012_20_346_44    | 0                   | -16.76        | 5.14              |
| 214 | JMC_2016_59_6121_42   | 0                   | -16.75        | 5.99              |
| 215 | JMC_2016_59_6121_38   | 0                   | -16.67        | 6.13              |
| 216 | BMC_2013_21_7858_43   | 1                   | -16.58        | 5.76              |
| 217 | CMC_2012_7_650_AG1428 | 1                   | -16.57        | 5.26              |
| 218 | BMC_2013_21_7858_46   | 1                   | -16.56        | 5.42              |
| 219 | JMC_2012_55_966_6i    | 1                   | -16.46        | 6.8               |
| 220 | JMC_2016_59_6121_32   | 0                   | -16.45        | 5.72              |
| 221 | BMC_2012_20_346_13    | 0                   | -16.43        | 5.66              |
| 222 | BMC_2012_20_346_42    | 0                   | -16.34        | 5.25              |

| No. | Name                     | Pharmacophore model | Docking score | pIC <sub>50</sub> |
|-----|--------------------------|---------------------|---------------|-------------------|
| 223 | JMC_2016_59_6121_22      | 0                   | -16.31        | 5.56              |
| 224 | BMC_2013_21_7858_42      | 0                   | -16.09        | 5.32              |
| 225 | JMC_2016_59_6121_51      | 1                   | -16.08        | 6.63              |
| 226 | BMC_2012_20_346_10       | 0                   | -16.07        | 5.48              |
| 227 | JMC_2016_59_6121_43      | 1                   | -16.06        | 6.16              |
| 228 | BMC_2012_20_346_41       | 0                   | -16.03        | 5.71              |
| 229 | BMC_2012_22_6766_19      | 1                   | -15.93        | 5.29              |
| 230 | BMC_2013_21_7858_44      | 1                   | -15.91        | 5.62              |
| 231 | CMC_2013_8_125_20        | 0                   | -15.84        | 5.51              |
| 232 | JMC_2016_59_6121_24      | 0                   | -15.78        | 5.66              |
| 233 | JMC_2016_59_6121_46      | 1                   | -15.72        | 5.76              |
| 234 | BMC_2012_22_6766_20      | 1                   | -15.71        | 5.23              |
| 235 | CMC_2013_8_125_22        | 0                   | -15.70        | 5.66              |
| 236 | JMC_2018_146_483_19      | 1                   | -15.66        | 5.08              |
| 237 | JMC_2016_59_6121_53      | 0                   | -15.65        | 6.42              |
| 238 | BMC_2012_22_6766_21      | 1                   | -15.64        | 5.09              |
| 239 | JMC_2016_59_6121_37      | 0                   | -15.57        | 6.06              |
| 240 | JMC_2013_67_115_19       | 0                   | -15.44        | 5.16              |
| 241 | JMC_2016_59_6121_44      | 1                   | -15.42        | 5.96              |
| 242 | BMC_2012_20_346_33       | 1                   | -15.39        | 5.71              |
| 243 | BMC_2012_20_346_31       | 0                   | -15.26        | 5.03              |
| 244 | JMC_2012_55_966_6f       | 1                   | -15.23        | 6.74              |
| 245 | CMC_2013_8_125_24        | 1                   | -15.21        | 5.53              |
| 246 | BMC_2012_20_346_39       | 0                   | -15.16        | 5.54              |
| 247 | JMC_2012_55_966_6h       | 1                   | -15.16        | 6.7               |
| 248 | JMC_2013_67_115_21       | 0                   | -15.15        | 4.65              |
| 249 | BMC_2012_20_346_16       | 1                   | -15.11        | 5.48              |
| 250 | JMC_2016_59_6121_50      | 1                   | -15.03        | 6.05              |
| 251 | JMC_2016_59_6121_48      | 1                   | -14.99        | 5.91              |
| 252 | BMC_2012_22_6766_18      | 1                   | -14.98        | 5.05              |
| 253 | BMC_2012_20_346_38       | 0                   | -14.86        | 5.59              |
| 254 | BMC_2012_20_346_5        | 1                   | -14.78        | 5.3               |
| 255 | JMC_2018_146_483_17      | 1                   | -14.76        | 4.8               |
| 256 | JMC_2013_67_115_20       | 0                   | -14.54        | 6.14              |
| 257 | JMC_2016_59_6121_25      | 1                   | -14.18        | 5.44              |
| 258 | CMC_2012_7_650_gefitinib | 0                   | -13.84        | 5.49              |
| 259 | BMC_2012_20_346_14       | 1                   | -13.80        | 5.97              |
| 260 | BMC_2012_20_346_12       | 0                   | -13.77        | 4.51              |
| 261 | JMC_2013_67_115_29       | 0                   | -13.61        | 4.96              |
| 262 | JMC_2016_59_6121_21      | 0                   | -13.48        | 5.63              |
| 263 | JMC_2016_59_6121_55      | 0                   | -13.45        | 4.98              |

| No. | Name                       | Pharmacophore model | Docking score | pIC <sub>50</sub> |
|-----|----------------------------|---------------------|---------------|-------------------|
| 264 | JMC_2018_146_483_14        | 0                   | -13.26        | 4.4               |
| 265 | JMC_2013_67_115_17         | 0                   | -13.21        | 6.28              |
| 266 | JMC_2018_146_483_18        | 1                   | -13.17        | 5.12              |
| 267 | BMC_2012_20_346_15         | 0                   | -13.01        | 5.83              |
| 268 | BMC_2013_21_7858_49        | 1                   | -12.97        | 5.86              |
| 269 | JMC_2013_67_115_16         | 1                   | -12.86        | 5.91              |
| 270 | JMC_2013_67_115_32         | 0                   | -12.84        | 4.95              |
| 271 | JMC_2009_52_1191_Elacridar | 0                   | -12.84        | 6.6               |
| 272 | JMC_2013_67_115_8          | 1                   | -12.82        | 5.93              |
| 273 | JMC_2013_67_115_18         | 0                   | -12.81        | 5.54              |
| 274 | JMC_2012_55_966_6e         | 1                   | -12.72        | 6.33              |
| 275 | BMC_2012_20_346_21         | 0                   | -12.55        | 5.58              |
| 276 | BMC_2012_20_346_7          | 0                   | -12.55        | 4.92              |
| 277 | JMC_2013_67_115_25         | 0                   | -12.51        | 5.61              |
| 278 | BMC_2013_21_7858_54        | 1                   | -12.50        | 5.76              |
| 279 | JMC_2012_55_966_6g         | 1                   | -12.48        | 6.96              |
| 280 | BMC_2012_20_346_11         | 0                   | -12.41        | 5.2               |
| 281 | JMC_2013_67_115_15         | 0                   | -12.40        | 5.89              |
| 282 | JMC_2012_55_966_6a         | 1                   | -12.37        | 6.77              |
| 283 | JMC_2013_67_115_30         | 0                   | -12.26        | 5.05              |
| 284 | BMC_2012_20_346_30         | 1                   | -12.14        | 5.76              |
| 285 | BMC_2012_20_346_26         | 1                   | -12.11        | 5.55              |
| 286 | BMC_2012_20_346_27         | 1                   | -12.06        | 5.94              |
| 287 | JMC_2013_67_115_26         | 0                   | -12.04        | 5.08              |
| 288 | JMC_2013_67_115_22         | 0                   | -11.90        | 5.57              |
| 289 | BMC_2012_20_346_24         | 1                   | -11.85        | 5.52              |
| 290 | JMC_2013_67_115_24         | 1                   | -11.84        | 6.37              |
| 291 | JMC_2013_67_115_14         | 0                   | -11.83        | 5.88              |
| 292 | JMC_2013_67_115_4          | 0                   | -11.73        | 6                 |
| 293 | JMC_2013_67_115_6          | 0                   | -11.58        | 5.92              |
| 294 | JMC_2013_67_115_27         | 0                   | -11.58        | 5.61              |
| 295 | JMC_2013_67_115_31         | 0                   | -11.57        | 5.21              |
| 296 | JMC_2013_67_115_33         | 1                   | -11.24        | 5.51              |
| 297 | JMC_2013_67_115_28         | 1                   | -11.17        | 6.23              |
| 298 | JMC_2013_67_115_9          | 1                   | -11.07        | 5.93              |
| 299 | BMC_2012_20_346_17         | 0                   | -10.87        | 4.97              |
| 300 | JMC_2013_67_115_23         | 0                   | -10.52        | 5.97              |
| 301 | BMC_2012_20_346_8          | 1                   | -10.36        | 6.07              |
| 302 | BMC_2012_20_346_29         | 1                   | -10.28        | 5.11              |
| 303 | JMC_2013_67_115_7          | 1                   | -10.23        | 5.11              |
| 304 | JMC_2013_67_115_34         | 1                   | -10.00        | 5.37              |

| No. | Name                        | Pharmacophore model | Docking score | pIC <sub>50</sub> |
|-----|-----------------------------|---------------------|---------------|-------------------|
| 305 | BMC_2012_20_346_25          | 1                   | -9.99         | 6.28              |
| 306 | JMC_2009_52_1191_Tariquidar | 1                   | -9.89         | 6.04              |
| 307 | BMC_2012_20_346_28          | 1                   | -9.75         | 5.42              |
| 308 | JMC_2013_67_115_5           | 0                   | -9.67         | 4.91              |
| 309 | JMC_2009_52_1191_11         | 0                   | -9.35         | 5.99              |
| 310 | JMC_2013_67_115_12          | 1                   | -9.27         | 6.27              |
| 311 | JMC_2009_52_1191_10         | 0                   | -8.86         | 6.2               |
| 312 | BMC_2012_20_346_19          | 0                   | -8.73         | 5.72              |
| 313 | JMC_2009_52_1191_14         | 1                   | -8.20         | 6.01              |
| 314 | JMC_2009_52_1191_15         | 0                   | -8.16         | 5.7               |
| 315 | JMC_2013_67_115_13          | 1                   | -8.13         | 5.49              |
| 316 | JMC_2013_67_115_10          | 1                   | -7.44         | 6.09              |
| 317 | JMC_2009_52_1191_12         | 0                   | -6.81         | 6.5               |
| 318 | JMC_2013_67_115_11          | 1                   | -6.73         | 5.22              |
| 319 | JMC_2009_52_1191_5          | 0                   | -6.63         | 6.92              |
| 320 | JMC_2009_52_1191_9          | 0                   | -6.27         | 6.26              |
| 321 | JMC_2009_52_1191_8          | 1                   | -6.22         | 6.75              |
| 322 | JMC_2009_52_1190_Ko143      | 1                   | -6.22         | 6.65              |
| 323 | JMC_2009_52_1191_7          | 0                   | -6.21         | 6.74              |
| 324 | JMC_2009_52_1191_6          | 0                   | -6.20         | 7.22              |
| 325 | JMC_2009_52_1191_13         | 0                   | -4.12         | 6.07              |

>sp|Q9UNQ0|ABCG2\_HUMAN ATP-binding cassette sub-family G member 2  
OS=Homo sapiens OX=9606 GN=ABCG2 PE=1 SV=3

MSSSNVEVFIPVSQGNTNGFPATASNDLKAFTEGAVLSFHNICYRVKLKSGF  
LPCRKPVEKEILSNINGIMKPGLNAILGPTGGGKSSLLDVLAARKDPSGLSG  
DVLINGAPRPANFKCNSGYVVQDDVVMGTLTVRENLQFSAALRLATTMTN  
HEKNERINRVIQELGLDKVADSKVGTQFIRGVSGGERKRTSIGMELITDPSIL  
FLDEPTTGLDSSTANAVLLLLKRMSKQGRTIIFSIHQPRYSIFKLFDSTLLAS  
GRLMFHGP AQEALGYFESAGYHCEAYNNPADFFLDIINGDSTAV ALNREED  
FKATEIIEPSKQDKPLIEKLA EIYVNSSFYKETKAELHQLSGGEKKKKITVFK  
EISYTTSFCHQLRWVSKRSFKNLLGNPQASIAQIIVTVVLGLVIGAIYFGLKN  
DSTGIQNRAGVLFFLT TNQCFSSVSAVELFVVEKKLFIHEYISGY YRVSSYFL  
GKLLSDLLPMRMLPSIIFTCIVYFMLGLKPKADAFFVMMFTLMMVAYSASS  
MALAIAAGQSVVSVATLLMTICFVFM MIFSGLLVNLT TIASWLSWLQYFSIP  
RYGFTALQHNEFLGQNFCPGLNATGNNPCNYATCTGEEYLVKQGIDLSPW  
GLWKNHVALACMIVIFLTIA YLKLLFLKKYS

**Figure S1:** The amino acid sequence of the ABCG2 protein
